# Supplementary material for: Maternal-fetal bonding among pregnant women at psychosocial risk: The roles of adult attachment style, prenatal parental reflective functioning, and depressive symptoms
Source: PubMed Central journal article supplement (PMC7498041; doi:10.1371/journal.pone.0239208), 2020-09-17
Supplement: pone.0239208.s001.pdf [file pone.0239208.s001.pdf]

*Avoidant attachment and anxious attachment and MAAS quality  
Test for linearity assumption*

*Dependent Variable: MAAS\_Q\_Blm*

| Source               | DF | Type III SS | Mean Square | F Value | Pr > F |
|----------------------|----|-------------|-------------|---------|--------|
| ECRS_Av_BLm          | 1  | 35.56127478 | 35.56127478 | 2.45    | 0.1220 |
| ECRS_Av_B*ECRS_Av_BL | 1  | 29.63202135 | 29.63202135 | 2.04    | 0.1574 |
| ECRS_A*ECRS_A*ECRS_A | 1  | 26.79311980 | 26.79311980 | 1.84    | 0.1786 |
| ECRS*ECRS*ECRS*ECRS_ | 1  | 25.42271929 | 25.42271929 | 1.75    | 0.1899 |

*Avoidant attachment and anxious attachment and MAAS quality  
Test for linearity assumption*

*Dependent Variable: MAAS\_Q\_Blm*

| Source               | DF | Type III SS | Mean Square | F Value | Pr > F |
|----------------------|----|-------------|-------------|---------|--------|
| ECRS_Av_BLm          | 1  | 16.30211574 | 16.30211574 | 1.11    | 0.2952 |
| ECRS_Av_B*ECRS_Av_BL | 1  | 7.04918423  | 7.04918423  | 0.48    | 0.4904 |
| ECRS_A*ECRS_A*ECRS_A | 1  | 2.95479679  | 2.95479679  | 0.20    | 0.6549 |

*Avoidant attachment and anxious attachment and MAAS quality  
Test for linearity assumption*

*Dependent Variable: MAAS\_Q\_Blm*

| Source               | DF | Type III SS | Mean Square | F Value | Pr > F |
|----------------------|----|-------------|-------------|---------|--------|
| ECRS_Av_BLm          | 1  | 90.18890749 | 90.18890749 | 6.21    | 0.0149 |
| ECRS_Av_B*ECRS_Av_BL | 1  | 59.39014709 | 59.39014709 | 4.09    | 0.0467 |

*Avoidant attachment and anxious attachment and MAAS quality  
Association between variable and outcome*

|                             |    |
|-----------------------------|----|
| Number of Observations Read | 78 |
| Number of Observations Used | 78 |

*Dependent Variable: MAAS\_Q\_Blm*

| Source                 | DF | Sum of Squares | Mean Square | F Value | Pr > F |
|------------------------|----|----------------|-------------|---------|--------|
| <b>Model</b>           | 1  | 101.310284     | 101.310284  | 6.71    | 0.0115 |
| <b>Error</b>           | 76 | 1147.966861    | 15.104827   |         |        |
| <b>Corrected Total</b> | 77 | 1249.277145    |             |         |        |

| R-Square | Coeff Var | Root MSE | MAAS_Q_Blm Mean |
|----------|-----------|----------|-----------------|
| 0.081095 | 8.822370  | 3.886493 | 44.05271        |

| Source             | DF | Type III SS | Mean Square | F Value | Pr > F |
|--------------------|----|-------------|-------------|---------|--------|
| <b>ECRS_Av_BLm</b> | 1  | 101.3102837 | 101.3102837 | 6.71    | 0.0115 |

| Parameter          | Estimate    | Standard Error | t Value | Pr >  t | 95% Confidence Limits |             |
|--------------------|-------------|----------------|---------|---------|-----------------------|-------------|
| <b>Intercept</b>   | 46.72712589 | 1.12252142     | 41.63   | <.0001  | 44.49143074           | 48.96282105 |
| <b>ECRS_Av_BLm</b> | -0.23977553 | 0.09258401     | -2.59   | 0.0115  | -0.42417256           | -0.05537850 |

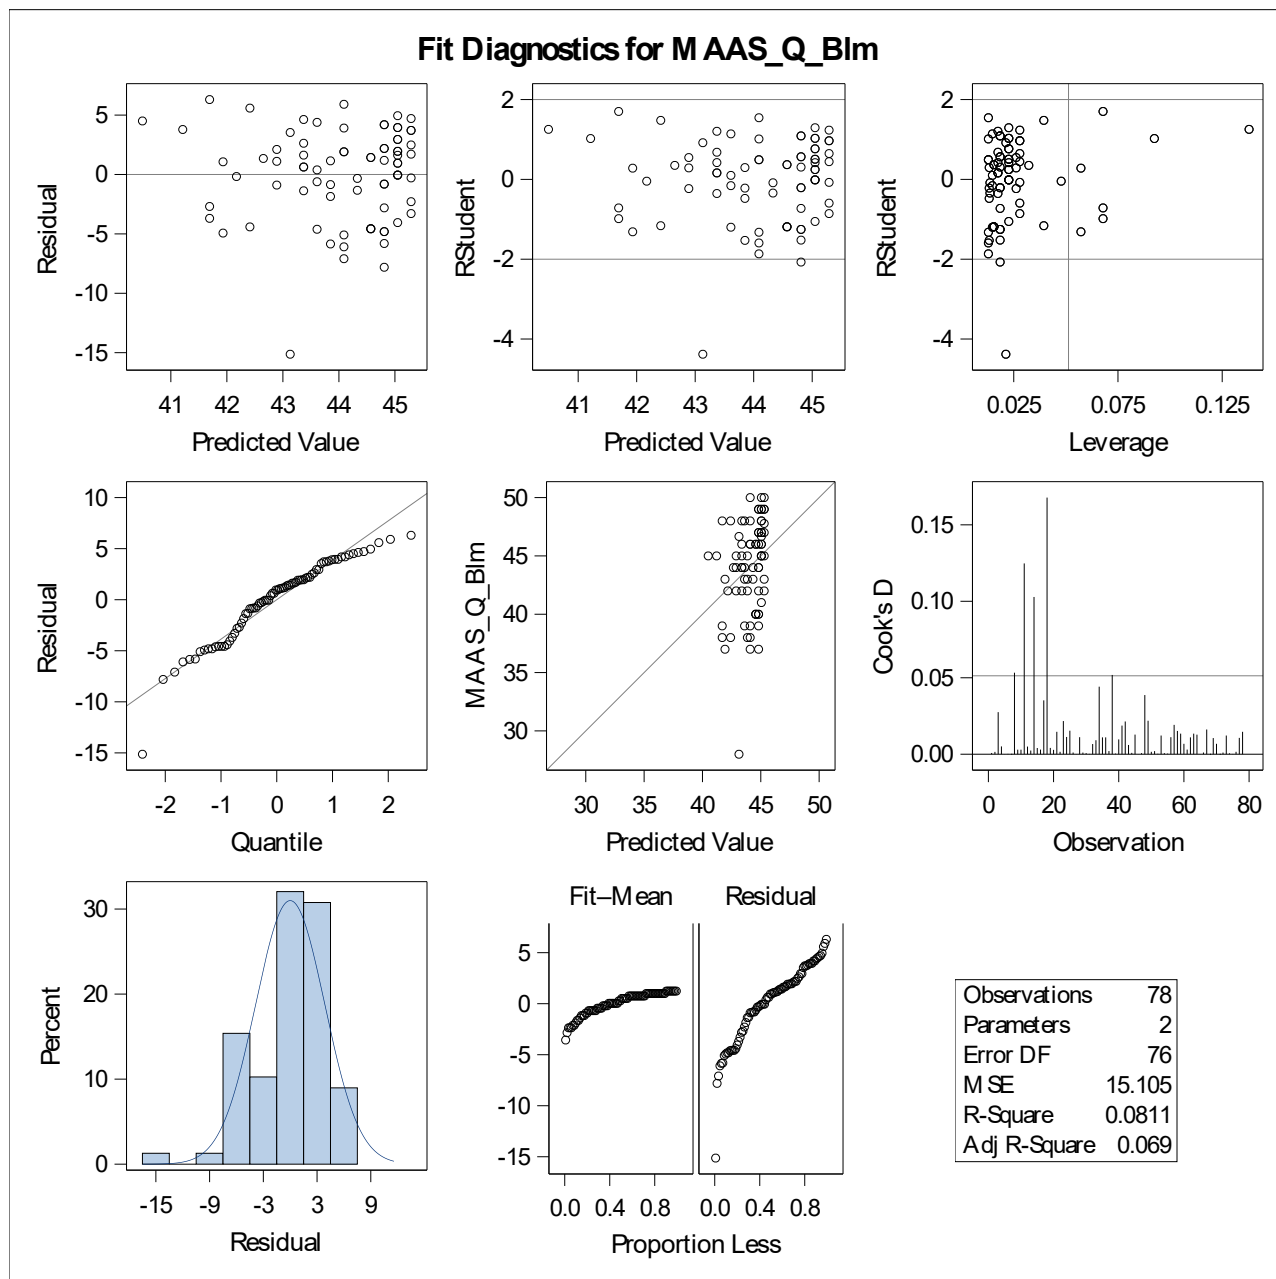

***Avoidant attachment and anxious attachment and MAAS quality  
Test for linearity assumption***

***Dependent Variable: MAAS\_Q\_Blm***

| Source                      | DF | Type III SS | Mean Square | F Value | Pr > F |
|-----------------------------|----|-------------|-------------|---------|--------|
| <b>ECRS_An_BLm</b>          | 1  | 12.27166374 | 12.27166374 | 0.77    | 0.3821 |
| <b>ECRS_An_B*ECRS_An_BL</b> | 1  | 8.85771431  | 8.85771431  | 0.56    | 0.4574 |
| <b>ECRS_A*ECRS_A*ECRS_A</b> | 1  | 5.17189114  | 5.17189114  | 0.33    | 0.5699 |
| <b>ECRS*ECRS*ECRS*ECRS_</b> | 1  | 2.41907992  | 2.41907992  | 0.15    | 0.6974 |

*Avoidant attachment and anxious attachment and MAAS quality  
Test for linearity assumption*

*Dependent Variable: MAAS\_Q\_Blm*

| Source               | DF | Type III SS | Mean Square | F Value | Pr > F |
|----------------------|----|-------------|-------------|---------|--------|
| ECRS_An_BLm          | 1  | 36.39664827 | 36.39664827 | 2.32    | 0.1320 |
| ECRS_An_B*ECRS_An_BL | 1  | 47.72845654 | 47.72845654 | 3.04    | 0.0853 |
| ECRS_A*ECRS_A*ECRS_A | 1  | 56.86470003 | 56.86470003 | 3.62    | 0.0608 |

*Avoidant attachment and anxious attachment and MAAS quality  
Test for linearity assumption*

*Dependent Variable: MAAS\_Q\_Blm*

| Source               | DF | Type III SS | Mean Square | F Value | Pr > F |
|----------------------|----|-------------|-------------|---------|--------|
| ECRS_An_BLm          | 1  | 31.23803586 | 31.23803586 | 1.92    | 0.1696 |
| ECRS_An_B*ECRS_An_BL | 1  | 28.88273471 | 28.88273471 | 1.78    | 0.1863 |

*Avoidant attachment and anxious attachment and MAAS quality  
Association between variable and outcome*

|                             |    |
|-----------------------------|----|
| Number of Observations Read | 78 |
| Number of Observations Used | 78 |

*Dependent Variable: MAAS\_Q\_Blm*

| Source          | DF | Sum of Squares | Mean Square | F Value | Pr > F |
|-----------------|----|----------------|-------------|---------|--------|
| Model           | 1  | 2.525877       | 2.525877    | 0.15    | 0.6959 |
| Error           | 76 | 1246.751268    | 16.404622   |         |        |
| Corrected Total | 77 | 1249.277145    |             |         |        |

| R-Square | Coeff Var | Root MSE | MAAS_Q_Blm Mean |
|----------|-----------|----------|-----------------|
| 0.002022 | 9.194127  | 4.050262 | 44.05271        |

| Source      | DF | Type III SS | Mean Square | F Value | Pr > F |
|-------------|----|-------------|-------------|---------|--------|
| ECRS_An_BLM | 1  | 2.52587650  | 2.52587650  | 0.15    | 0.6959 |

| Parameter   | Estimate    | Standard Error | t Value | Pr >  t | 95% Confidence Limits |             |
|-------------|-------------|----------------|---------|---------|-----------------------|-------------|
| Intercept   | 44.61737977 | 1.51035259     | 29.54   | <.0001  | 41.60925189           | 47.62550765 |
| ECRS_An_BLM | -0.02874968 | 0.07326728     | -0.39   | 0.6959  | -0.17467412           | 0.11717476  |

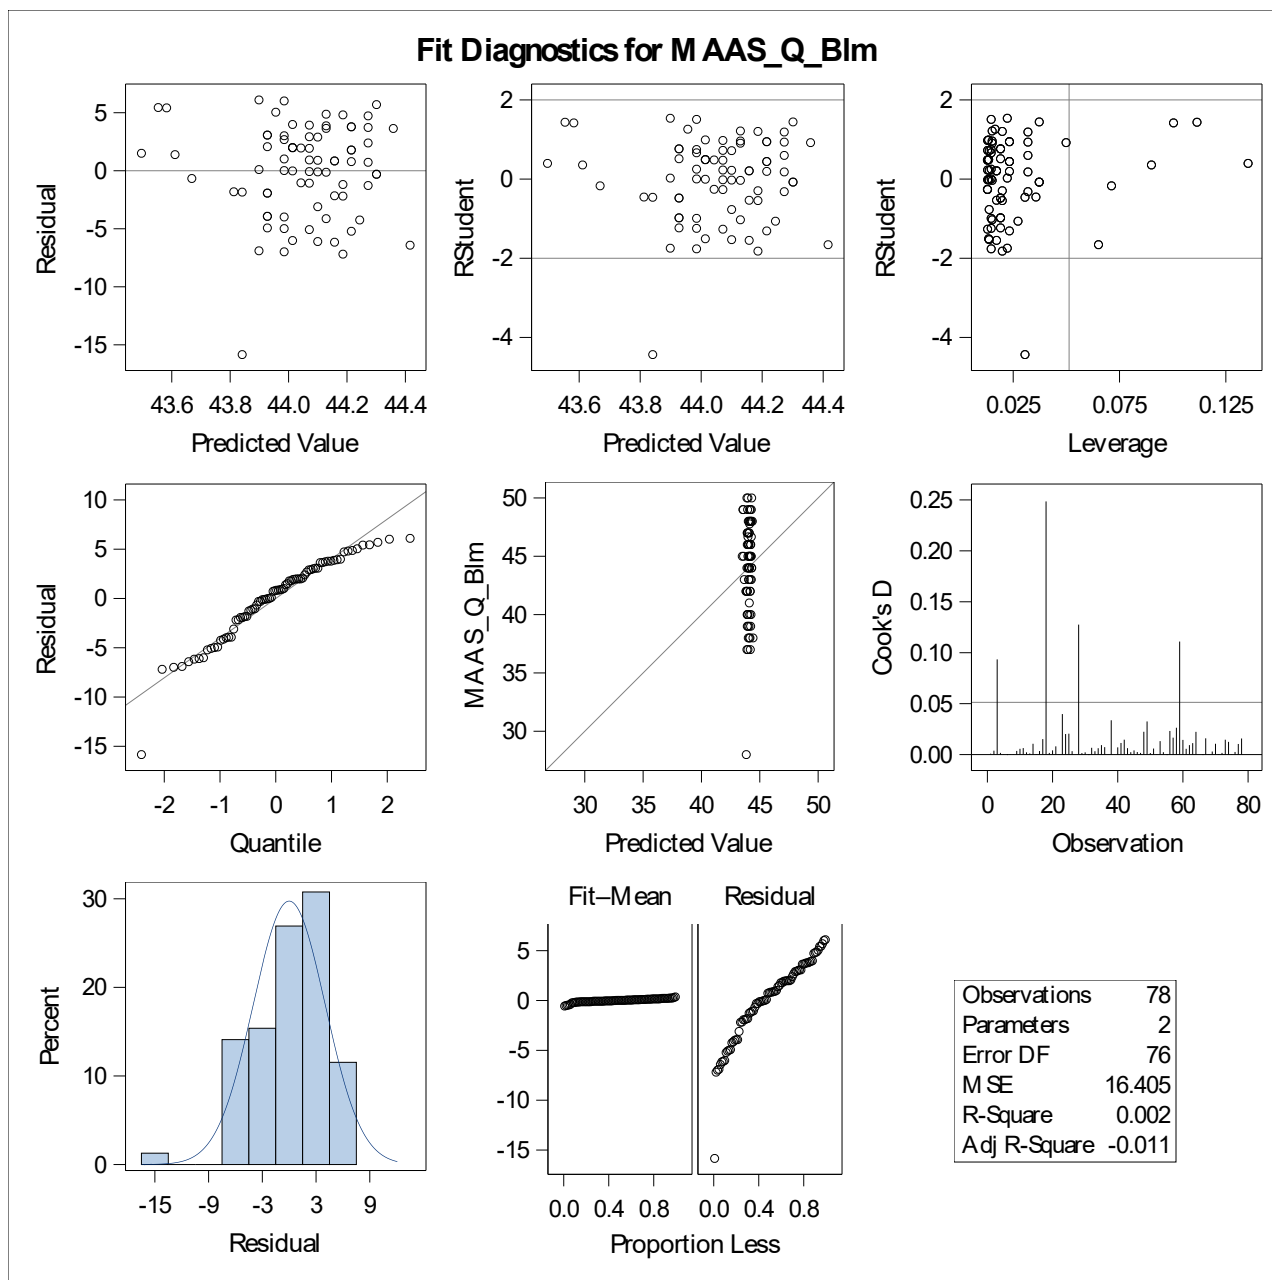

*Avoidant attachment and anxious attachment and MAAS quality  
Test for linearity assumption*

*Dependent Variable: MAAS\_Q\_Blm*

| Source               | DF | Type III SS | Mean Square | F Value | Pr > F |
|----------------------|----|-------------|-------------|---------|--------|
| EPDS_BLm             | 1  | 33.28257425 | 33.28257425 | 2.37    | 0.1280 |
| EPDS_BLm*EPDS_BLm    | 1  | 26.49202933 | 26.49202933 | 1.89    | 0.1737 |
| EPDS_B*EPDS_B*EPDS_B | 1  | 30.27849917 | 30.27849917 | 2.16    | 0.1462 |
| EPDS*EPDS*EPDS*EPDS_ | 1  | 34.31651344 | 34.31651344 | 2.44    | 0.1223 |

*Avoidant attachment and anxious attachment and MAAS quality  
Test for linearity assumption*

*Dependent Variable: MAAS\_Q\_Blm*

| Source               | DF | Type III SS | Mean Square | F Value | Pr > F |
|----------------------|----|-------------|-------------|---------|--------|
| EPDS_BLm             | 1  | 2.01022183  | 2.01022183  | 0.14    | 0.7089 |
| EPDS_BLm*EPDS_BLm    | 1  | 2.40053413  | 2.40053413  | 0.17    | 0.6833 |
| EPDS_B*EPDS_B*EPDS_B | 1  | 5.27919732  | 5.27919732  | 0.37    | 0.5455 |

*Avoidant attachment and anxious attachment and MAAS quality  
Test for linearity assumption*

*Dependent Variable: MAAS\_Q\_Blm*

| Source            | DF | Type III SS | Mean Square | F Value | Pr > F |
|-------------------|----|-------------|-------------|---------|--------|
| EPDS_BLm          | 1  | 54.55017778 | 54.55017778 | 3.84    | 0.0537 |
| EPDS_BLm*EPDS_BLm | 1  | 10.59340542 | 10.59340542 | 0.75    | 0.3904 |

*Avoidant attachment and anxious attachment and MAAS quality  
Association between variable and outcome*

|                             |    |
|-----------------------------|----|
| Number of Observations Read | 78 |
| Number of Observations Used | 78 |

*Dependent Variable: MAAS\_Q\_Blm*

| Source                 | DF | Sum of Squares | Mean Square | F Value | Pr > F |
|------------------------|----|----------------|-------------|---------|--------|
| <b>Model</b>           | 1  | 174.235241     | 174.235241  | 12.32   | 0.0008 |
| <b>Error</b>           | 76 | 1075.041904    | 14.145288   |         |        |
| <b>Corrected Total</b> | 77 | 1249.277145    |             |         |        |

| R-Square | Coeff Var | Root MSE | MAAS_Q_Blm Mean |
|----------|-----------|----------|-----------------|
| 0.139469 | 8.537551  | 3.761022 | 44.05271        |

| Source          | DF | Type III SS | Mean Square | F Value | Pr > F |
|-----------------|----|-------------|-------------|---------|--------|
| <b>EPDS_BLM</b> | 1  | 174.2352409 | 174.2352409 | 12.32   | 0.0008 |

| Parameter        | Estimate    | Standard Error | t Value | Pr >  t | 95% Confidence Limits |             |
|------------------|-------------|----------------|---------|---------|-----------------------|-------------|
| <b>Intercept</b> | 46.54201385 | 0.82729980     | 56.26   | <.0001  | 44.89430351           | 48.18972420 |
| <b>EPDS_BLM</b>  | -0.29285968 | 0.08344446     | -3.51   | 0.0008  | -0.45905372           | -0.12666565 |

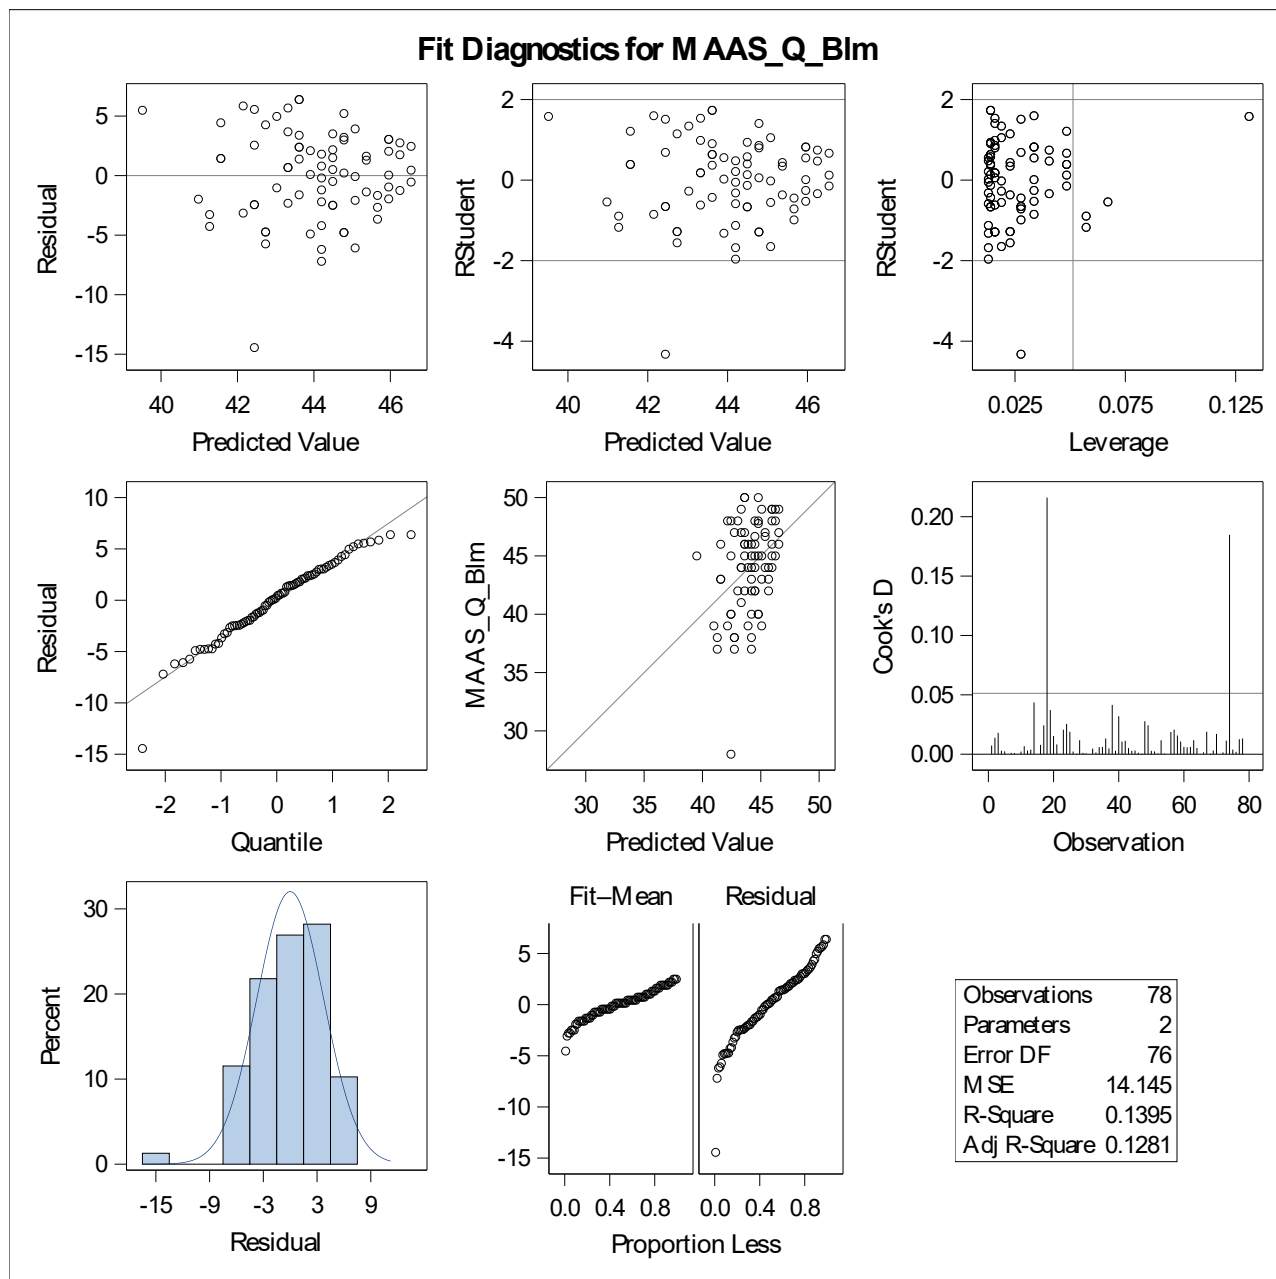

***Avoidant attachment and anxious attachment and MAAS quality  
Test for linearity assumption***

***Dependent Variable: MAAS\_Q\_Blm***

| Source               | DF | Type III SS | Mean Square | F Value | Pr > F |
|----------------------|----|-------------|-------------|---------|--------|
| PPRFQ_BLm            | 1  | 11.28266225 | 11.28266225 | 0.74    | 0.3929 |
| PPRFQ_BLm*PPRFQ_BLm  | 1  | 10.28658313 | 10.28658313 | 0.67    | 0.4146 |
| PPRFQ_*PPRFQ_*PPRFQ_ | 1  | 9.25161250  | 9.25161250  | 0.61    | 0.4390 |
| PPRF*PPRF*PPRF*PPRFQ | 1  | 8.42705064  | 8.42705064  | 0.55    | 0.4600 |



*Avoidant attachment and anxious attachment and MAAS quality  
Test for linearity assumption*

*Dependent Variable: MAAS\_Q\_Blm*

| Source               | DF | Type III SS | Mean Square | F Value | Pr > F |
|----------------------|----|-------------|-------------|---------|--------|
| PPRFQ_BLm            | 1  | 7.27053087  | 7.27053087  | 0.48    | 0.4911 |
| PPRFQ_BLm*PPRFQ_BLm  | 1  | 7.41864628  | 7.41864628  | 0.49    | 0.4867 |
| PPRFQ_*PPRFQ_*PPRFQ_ | 1  | 6.32167770  | 6.32167770  | 0.42    | 0.5208 |

*Avoidant attachment and anxious attachment and MAAS quality  
Test for linearity assumption*

*Dependent Variable: MAAS\_Q\_Blm*

| Source              | DF | Type III SS | Mean Square | F Value | Pr > F |
|---------------------|----|-------------|-------------|---------|--------|
| PPRFQ_BLm           | 1  | 1.46344362  | 1.46344362  | 0.10    | 0.7562 |
| PPRFQ_BLm*PPRFQ_BLm | 1  | 6.23962381  | 6.23962381  | 0.41    | 0.5218 |

*Avoidant attachment and anxious attachment and MAAS quality  
Association between variable and outcome*

|                             |    |
|-----------------------------|----|
| Number of Observations Read | 78 |
| Number of Observations Used | 78 |

*Dependent Variable: MAAS\_Q\_Blm*

| Source          | DF | Sum of Squares | Mean Square | F Value | Pr > F |
|-----------------|----|----------------|-------------|---------|--------|
| Model           | 1  | 113.121262     | 113.121262  | 7.57    | 0.0074 |
| Error           | 76 | 1136.155883    | 14.949420   |         |        |
| Corrected Total | 77 | 1249.277145    |             |         |        |

| R-Square | Coeff Var | Root MSE | MAAS_Q_Blm Mean |
|----------|-----------|----------|-----------------|
| 0.090549 | 8.776868  | 3.866448 | 44.05271        |

| Source    | DF | Type III SS | Mean Square | F Value | Pr > F |
|-----------|----|-------------|-------------|---------|--------|
| PPRFQ_BLM | 1  | 113.1212616 | 113.1212616 | 7.57    | 0.0074 |

| Parameter | Estimate    | Standard Error | t Value | Pr >  t | 95% Confidence Limits |             |
|-----------|-------------|----------------|---------|---------|-----------------------|-------------|
| Intercept | 36.39197147 | 2.81910603     | 12.91   | <.0001  | 30.77723521           | 42.00670773 |
| PPRFQ_BLM | 0.11750980  | 0.04271832     | 2.75    | 0.0074  | 0.03242890            | 0.20259070  |

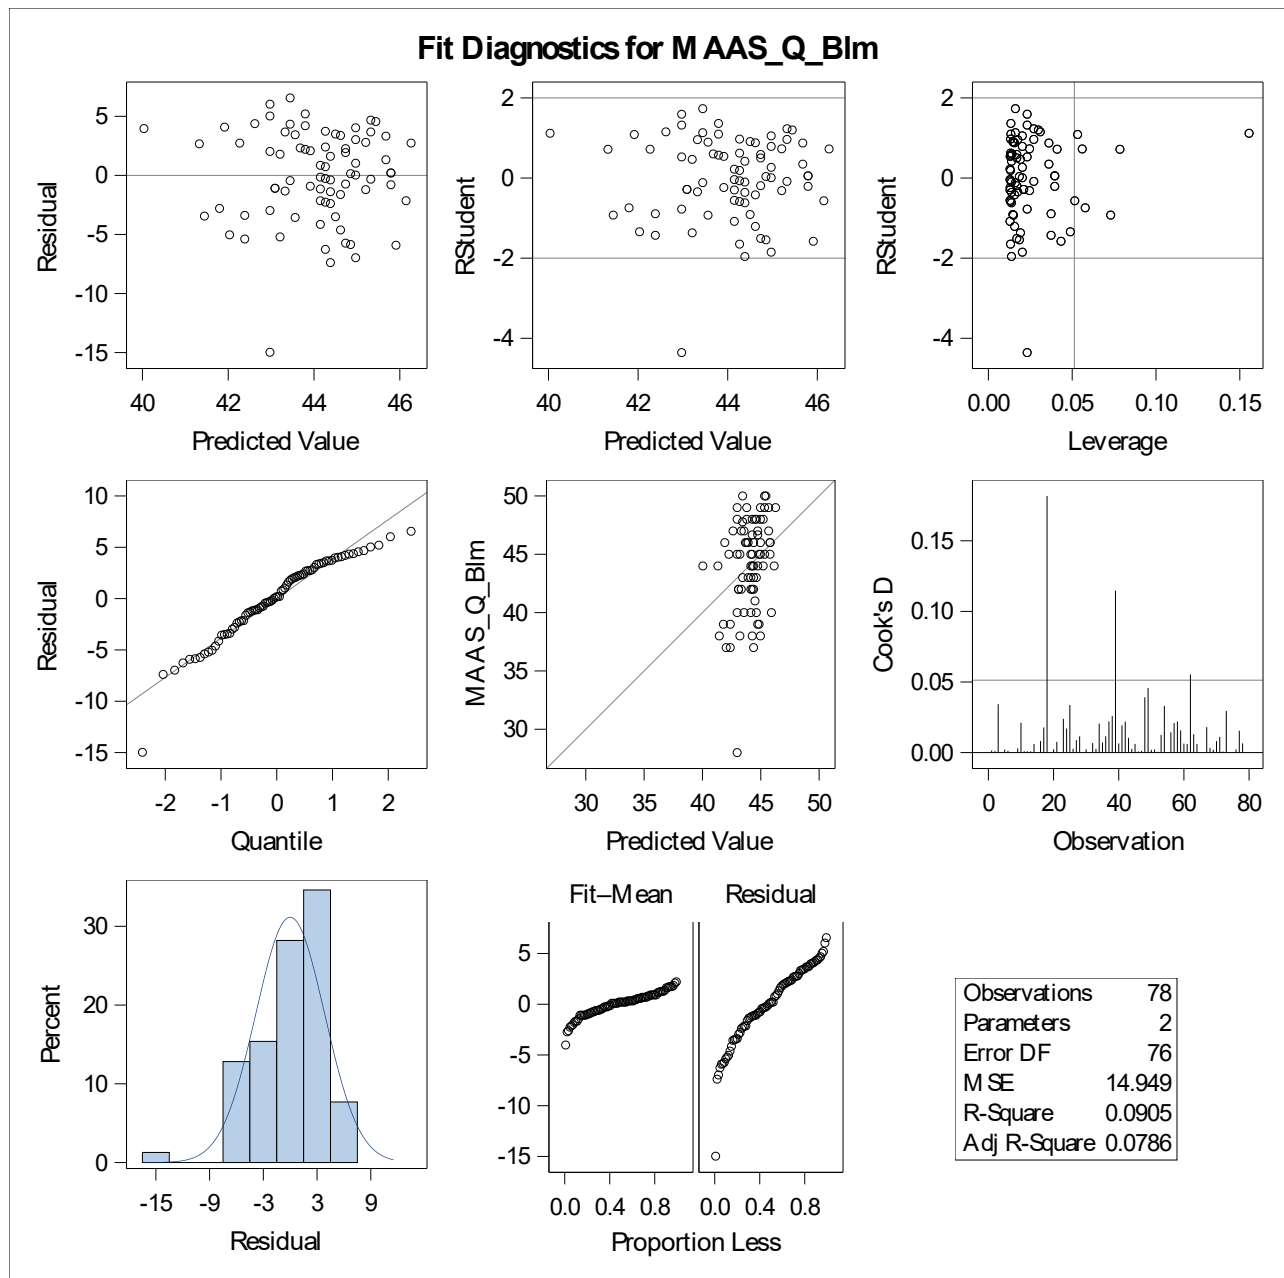

*Avoidant attachment and anxious attachment and MAAS quality  
Test for linearity assumption*

*Dependent Variable: MAAS\_Q\_Blm*

| Source      | DF | Type III SS | Mean Square | F Value | Pr > F |
|-------------|----|-------------|-------------|---------|--------|
| GA          | 1  | 3.45253894  | 3.45253894  | 0.22    | 0.6438 |
| GA*GA       | 1  | 1.73220654  | 1.73220654  | 0.11    | 0.7431 |
| GA*GA*GA    | 1  | 0.71494508  | 0.71494508  | 0.04    | 0.8332 |
| GA*GA*GA*GA | 1  | 0.20178194  | 0.20178194  | 0.01    | 0.9109 |

*Avoidant attachment and anxious attachment and MAAS quality  
Test for linearity assumption*

*Dependent Variable: MAAS\_Q\_Blm*

| Source   | DF | Type III SS | Mean Square | F Value | Pr > F |
|----------|----|-------------|-------------|---------|--------|
| GA       | 1  | 52.27428662 | 52.27428662 | 3.31    | 0.0729 |
| GA*GA    | 1  | 45.86429900 | 45.86429900 | 2.90    | 0.0926 |
| GA*GA*GA | 1  | 40.45354254 | 40.45354254 | 2.56    | 0.1138 |

*Avoidant attachment and anxious attachment and MAAS quality  
Test for linearity assumption*

*Dependent Variable: MAAS\_Q\_Blm*

| Source | DF | Type III SS | Mean Square | F Value | Pr > F |
|--------|----|-------------|-------------|---------|--------|
| GA     | 1  | 35.51261416 | 35.51261416 | 2.20    | 0.1420 |
| GA*GA  | 1  | 31.31326024 | 31.31326024 | 1.94    | 0.1676 |

*Avoidant attachment and anxious attachment and MAAS quality  
Association between variable and outcome*

|                                    |    |
|------------------------------------|----|
| <b>Number of Observations Read</b> | 78 |
| <b>Number of Observations Used</b> | 78 |

*Dependent Variable: MAAS\_Q\_Blm*

| Source                 | DF | Sum of Squares | Mean Square | F Value | Pr > F |
|------------------------|----|----------------|-------------|---------|--------|
| <b>Model</b>           | 1  | 8.629838       | 8.629838    | 0.53    | 0.4694 |
| <b>Error</b>           | 76 | 1240.647307    | 16.324307   |         |        |
| <b>Corrected Total</b> | 77 | 1249.277145    |             |         |        |

| R-Square | Coeff Var | Root MSE | MAAS_Q_Blm Mean |
|----------|-----------|----------|-----------------|
| 0.006908 | 9.171593  | 4.040335 | 44.05271        |

| Source    | DF | Type III SS | Mean Square | F Value | Pr > F |
|-----------|----|-------------|-------------|---------|--------|
| <b>GA</b> | 1  | 8.62983787  | 8.62983787  | 0.53    | 0.4694 |

| Parameter        | Estimate    | Standard Error | t Value | Pr >  t | 95% Confidence Limits |             |
|------------------|-------------|----------------|---------|---------|-----------------------|-------------|
| <b>Intercept</b> | 42.68983149 | 1.92946114     | 22.13   | <.0001  | 38.84697658           | 46.53268640 |
| <b>GA</b>        | 0.08545358  | 0.11752935     | 0.73    | 0.4694  | -0.14862640           | 0.31953356  |

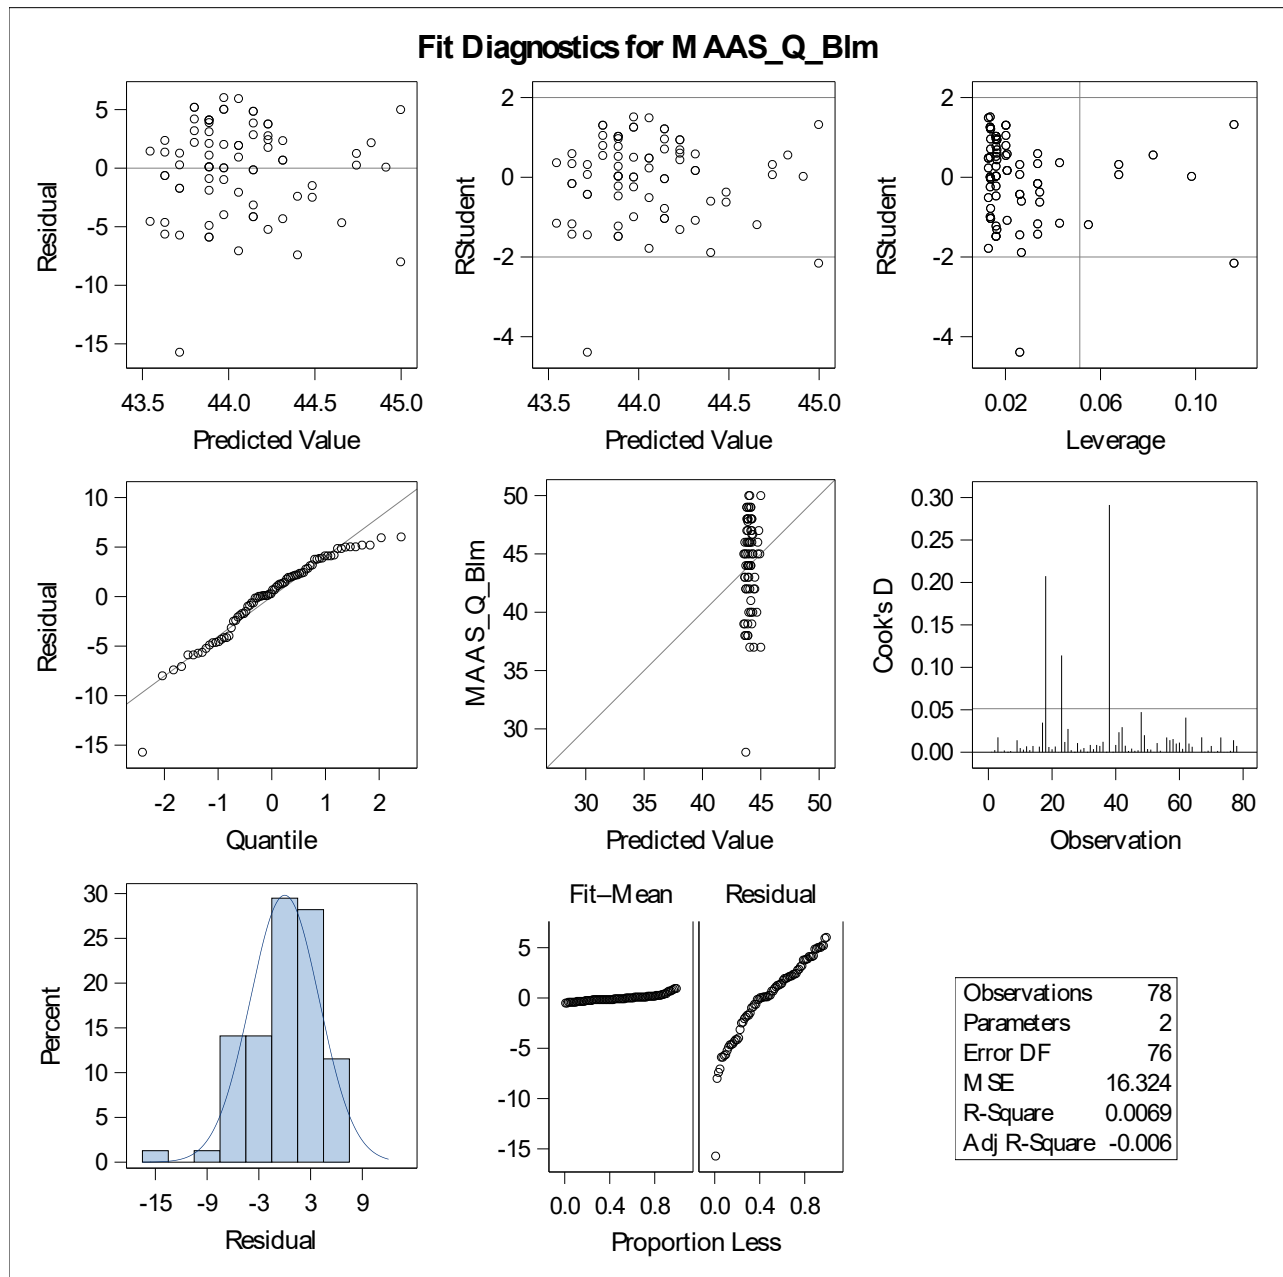

***Avoidant attachment and anxious attachment and MAAS quality  
Test for linearity assumption***

***Dependent Variable: MAAS\_Q\_Blm***

| Source                     | DF | Type III SS | Mean Square | F Value | Pr > F |
|----------------------------|----|-------------|-------------|---------|--------|
| <b>Mage</b>                | 1  | 30.23807024 | 30.23807024 | 2.04    | 0.1574 |
| <b>Mage*Mage</b>           | 1  | 26.99417853 | 26.99417853 | 1.82    | 0.1813 |
| <b>Mage*Mage*Mage</b>      | 1  | 23.14714550 | 23.14714550 | 1.56    | 0.2154 |
| <b>Mage*Mage*Mage*Mage</b> | 1  | 19.13419339 | 19.13419339 | 1.29    | 0.2596 |

*Avoidant attachment and anxious attachment and MAAS quality  
Test for linearity assumption*

*Dependent Variable: MAAS\_Q\_Blm*

| Source         | DF | Type III SS | Mean Square | F Value | Pr > F |
|----------------|----|-------------|-------------|---------|--------|
| Mage           | 1  | 56.47729644 | 56.47729644 | 3.80    | 0.0552 |
| Mage*Mage      | 1  | 66.79182605 | 66.79182605 | 4.49    | 0.0375 |
| Mage*Mage*Mage | 1  | 75.39462212 | 75.39462212 | 5.07    | 0.0273 |

*Avoidant attachment and anxious attachment and MAAS quality  
Test for linearity assumption*

*Dependent Variable: MAAS\_Q\_Blm*

| Source    | DF | Type III SS | Mean Square | F Value | Pr > F |
|-----------|----|-------------|-------------|---------|--------|
| Mage      | 1  | 51.71471939 | 51.71471939 | 3.30    | 0.0734 |
| Mage*Mage | 1  | 43.57691781 | 43.57691781 | 2.78    | 0.0997 |

*Avoidant attachment and anxious attachment and MAAS quality  
Association between variable and outcome*

|                             |    |
|-----------------------------|----|
| Number of Observations Read | 78 |
| Number of Observations Used | 78 |

*Dependent Variable: MAAS\_Q\_Blm*

| Source          | DF | Sum of Squares | Mean Square | F Value | Pr > F |
|-----------------|----|----------------|-------------|---------|--------|
| Model           | 1  | 29.335982      | 29.335982   | 1.83    | 0.1804 |
| Error           | 76 | 1219.941163    | 16.051857   |         |        |
| Corrected Total | 77 | 1249.277145    |             |         |        |

| R-Square | Coeff Var | Root MSE | MAAS_Q_Blm Mean |
|----------|-----------|----------|-----------------|
| 0.023482 | 9.094735  | 4.006477 | 44.05271        |

| Source | DF | Type III SS | Mean Square | F Value | Pr > F |
|--------|----|-------------|-------------|---------|--------|
| Mage   | 1  | 29.33598154 | 29.33598154 | 1.83    | 0.1804 |

| Parameter | Estimate    | Standard Error | t Value | Pr >  t | 95% Confidence Limits |             |
|-----------|-------------|----------------|---------|---------|-----------------------|-------------|
| Intercept | 47.57496977 | 2.64465621     | 17.99   | <.0001  | 42.30768043           | 52.84225910 |
| Mage      | -0.11406391 | 0.08437438     | -1.35   | 0.1804  | -0.28211006           | 0.05398223  |

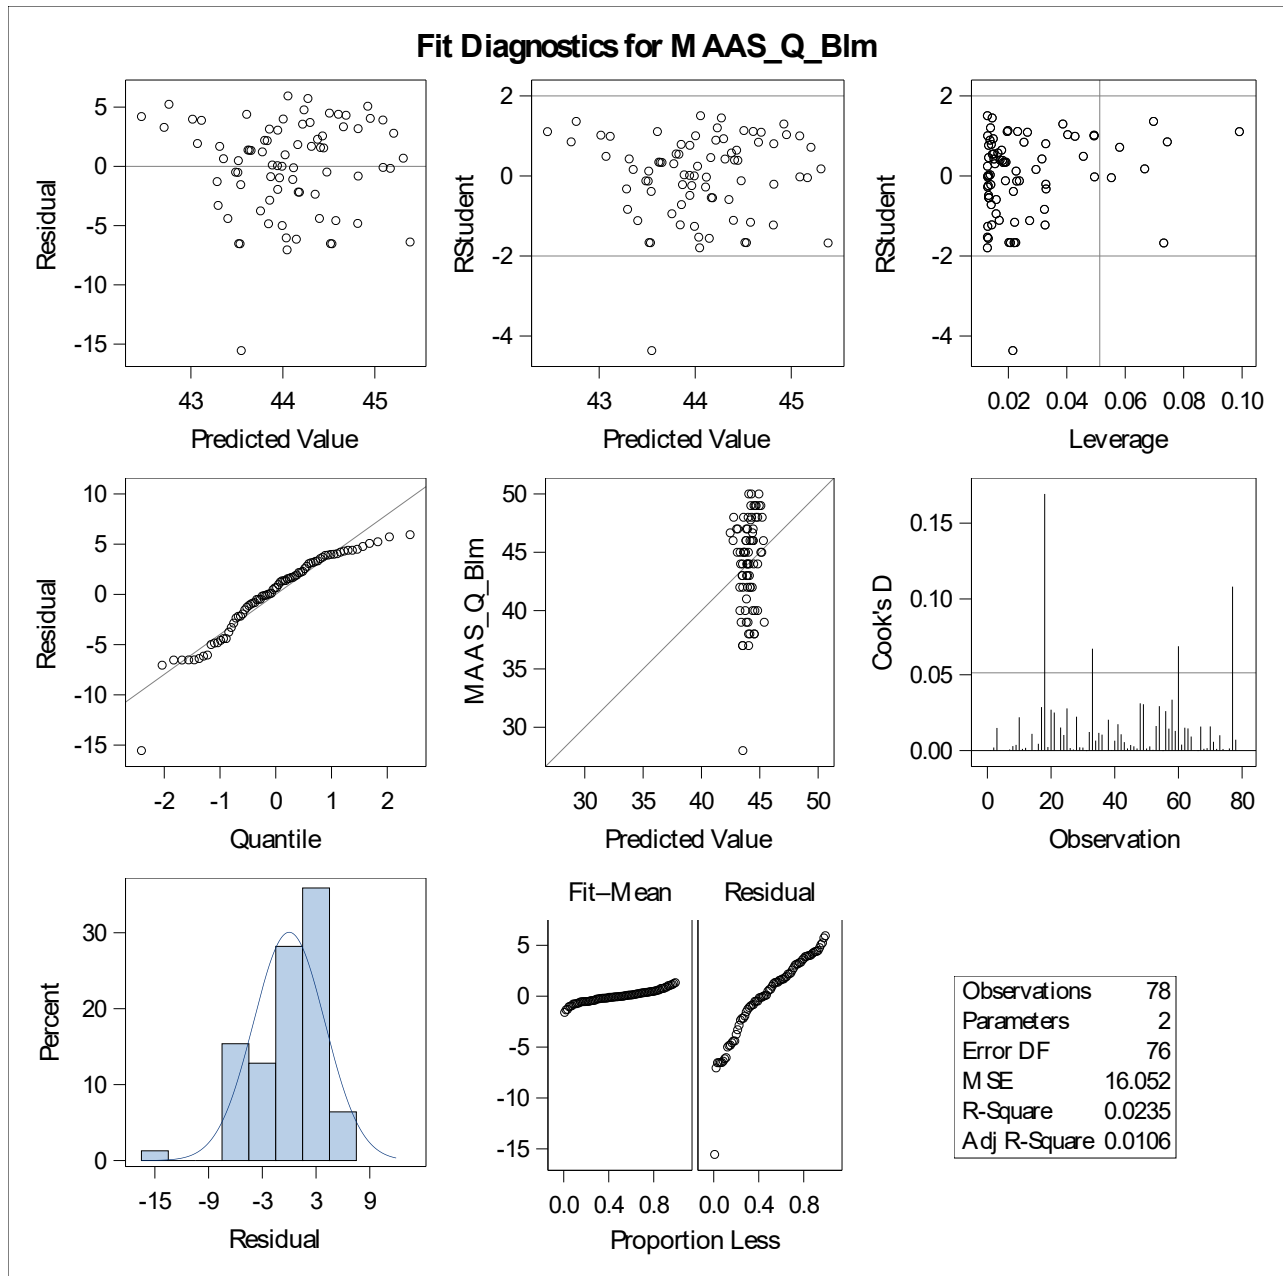

## Model fit plots

### Results model 1

| Class Level Information |        |        |
|-------------------------|--------|--------|
| Class                   | Levels | Values |
| Edu2way                 | 2      | 0 1    |
| Par                     | 2      | 0 1    |

|                             |    |
|-----------------------------|----|
| Number of Observations Read | 78 |
| Number of Observations Used | 78 |

### Dependent Variable: MAAS\_Q\_Blm

| Source          | DF | Sum of Squares | Mean Square | F Value | Pr > F |
|-----------------|----|----------------|-------------|---------|--------|
| Model           | 6  | 185.285968     | 30.880995   | 2.06    | 0.0687 |
| Error           | 71 | 1063.991177    | 14.985791   |         |        |
| Corrected Total | 77 | 1249.277145    |             |         |        |

| R-Square | Coeff Var | Root MSE | MAAS_Q_Blm Mean |
|----------|-----------|----------|-----------------|
| 0.148315 | 8.787539  | 3.871149 | 44.05271        |

| Source      | DF | Type III SS | Mean Square | F Value | Pr > F |
|-------------|----|-------------|-------------|---------|--------|
| ECRS_Av_BLm | 1  | 112.4912249 | 112.4912249 | 7.51    | 0.0078 |
| ECRS_An_BLm | 1  | 0.0240212   | 0.0240212   | 0.00    | 0.9682 |
| Edu2way     | 1  | 41.9831452  | 41.9831452  | 2.80    | 0.0986 |
| Par         | 1  | 1.6798581   | 1.6798581   | 0.11    | 0.7388 |
| Mage        | 1  | 3.8410287   | 3.8410287   | 0.26    | 0.6142 |
| GA          | 1  | 11.4829996  | 11.4829996  | 0.77    | 0.3843 |

| Parameter   | Estimate    |   | Standard Error | t Value | Pr >  t | 95% Confidence Limits |             |
|-------------|-------------|---|----------------|---------|---------|-----------------------|-------------|
| Intercept   | 45.72880782 | B | 3.88583014     | 11.77   | <.0001  | 37.98068259           | 53.47693306 |
| ECRS_Av_BLm | -0.26106357 |   | 0.09528550     | -2.74   | 0.0078  | -0.45105745           | -0.07106969 |
| ECRS_An_BLm | 0.00287657  |   | 0.07184846     | 0.04    | 0.9682  | -0.14038520           | 0.14613834  |
| Edu2way 0   | 1.57341417  | B | 0.94003800     | 1.67    | 0.0986  | -0.30096837           | 3.44779671  |
| Edu2way 1   | 0.00000000  | B | .              | .       | .       | .                     | .           |



| Parameter | Estimate    |   | Standard Error | t Value | Pr >  t | 95% Confidence Limits |            |
|-----------|-------------|---|----------------|---------|---------|-----------------------|------------|
| Par 0     | 0.33307073  | B | 0.99480972     | 0.33    | 0.7388  | -1.65052350           | 2.31666497 |
| Par 1     | 0.00000000  | B | .              | .       | .       | .                     | .          |
| Mage      | -0.04617621 |   | 0.09120829     | -0.51   | 0.6142  | -0.22804037           | 0.13568796 |
| GA        | 0.09924767  |   | 0.11337896     | 0.88    | 0.3843  | -0.12682356           | 0.32531890 |

**Note:** The X'X matrix has been found to be singular, and a generalized inverse was used to solve the normal equations. Terms whose estimates are followed by the letter 'B' are not uniquely estimable.

## Results model 2

| Class Level Information |        |        |
|-------------------------|--------|--------|
| Class                   | Levels | Values |
| Edu2way                 | 2      | 0 1    |
| Par                     | 2      | 0 1    |

|                             |    |
|-----------------------------|----|
| Number of Observations Read | 78 |
| Number of Observations Used | 78 |

*Dependent Variable: MAAS\_Q\_Blm*

| Source          | DF | Sum of Squares | Mean Square | F Value | Pr > F |
|-----------------|----|----------------|-------------|---------|--------|
| Model           | 8  | 402.187596     | 50.273449   | 4.10    | 0.0005 |
| Error           | 69 | 847.089549     | 12.276660   |         |        |
| Corrected Total | 77 | 1249.277145    |             |         |        |

| R-Square | Coeff Var | Root MSE | MAAS_Q_Blm Mean |
|----------|-----------|----------|-----------------|
| 0.321936 | 7.953669  | 3.503807 | 44.05271        |

| Source      | DF | Type III SS | Mean Square | F Value | Pr > F |
|-------------|----|-------------|-------------|---------|--------|
| ECRS_Av_BLM | 1  | 31.2376037  | 31.2376037  | 2.54    | 0.1153 |
| ECRS_An_BLM | 1  | 0.9124749   | 0.9124749   | 0.07    | 0.7860 |
| Edu2way     | 1  | 17.6339246  | 17.6339246  | 1.44    | 0.2348 |
| Par         | 1  | 5.8317285   | 5.8317285   | 0.48    | 0.4930 |
| Mage        | 1  | 0.9507850   | 0.9507850   | 0.08    | 0.7816 |
| GA          | 1  | 14.2647046  | 14.2647046  | 1.16    | 0.2848 |

| Source    | DF | Type III SS | Mean Square | F Value | Pr > F |
|-----------|----|-------------|-------------|---------|--------|
| EPDS_BLM  | 1  | 97.4011836  | 97.4011836  | 7.93    | 0.0063 |
| PPRFQ_BLM | 1  | 127.0410600 | 127.0410600 | 10.35   | 0.0020 |

| Parameter   | Estimate    |   | Standard Error | t Value | Pr >  t | 95% Confidence Limits |             |
|-------------|-------------|---|----------------|---------|---------|-----------------------|-------------|
| Intercept   | 37.44729083 | B | 4.41967774     | 8.47    | <.0001  | 28.63027498           | 46.26430669 |
| ECRS_Av_BLM | -0.15206573 |   | 0.09533066     | -1.60   | 0.1153  | -0.34224520           | 0.03811374  |
| ECRS_An_BLM | -0.01926647 |   | 0.07066947     | -0.27   | 0.7860  | -0.16024821           | 0.12171527  |
| Edu2way 0   | 1.04140029  | B | 0.86892706     | 1.20    | 0.2348  | -0.69206176           | 2.77486233  |
| Edu2way 1   | 0.00000000  | B | .              | .       | .       | .                     | .           |
| Par 0       | -0.65809743 | B | 0.95484232     | -0.69   | 0.4930  | -2.56295573           | 1.24676088  |
| Par 1       | 0.00000000  | B | .              | .       | .       | .                     | .           |
| Mage        | -0.02328289 |   | 0.08366346     | -0.28   | 0.7816  | -0.19018693           | 0.14362115  |
| GA          | 0.11111799  |   | 0.10308444     | 1.08    | 0.2848  | -0.09452983           | 0.31676581  |
| EPDS_BLM    | -0.25919256 |   | 0.09201964     | -2.82   | 0.0063  | -0.44276672           | -0.07561840 |
| PPRFQ_BLM   | 0.14748722  |   | 0.04584822     | 3.22    | 0.0020  | 0.05602253            | 0.23895192  |

**Note:** The X'X matrix has been found to be singular, and a generalized inverse was used to solve the normal equations. Terms whose estimates are followed by the letter 'B' are not uniquely estimable.

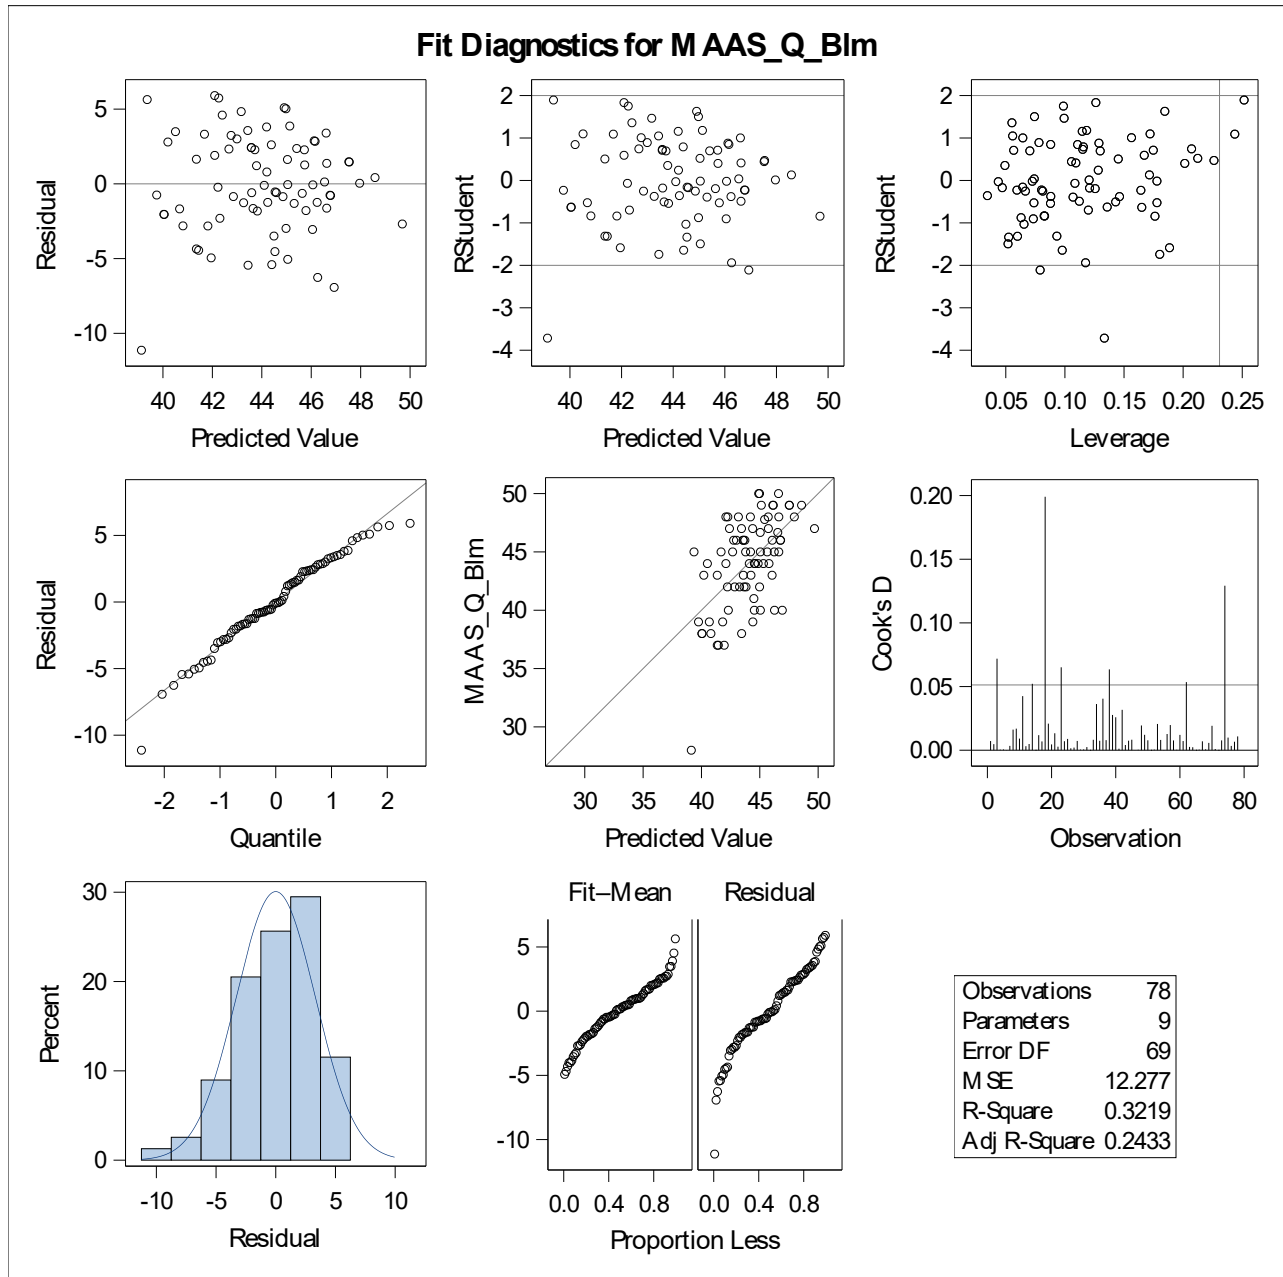

### *Standardized variables*

| Variable          | N  | Mean         | Std Dev   |
|-------------------|----|--------------|-----------|
| MAAS_Q_Blm_Stand  | 78 | -1.174132E-8 | 1.0000000 |
| MAAS_P_Blm_Stand  | 78 | 2.4011668E-9 | 1.0000000 |
| ECRS_An_Blm_stand | 78 | 6.5121999E-9 | 1.0000000 |
| ECRS_av_BLM_stand | 78 | -9.647868E-9 | 1.0000000 |
| EPDS_Blm_stand    | 78 | -6.40513E-18 | 1.0000000 |
| PPRFQ_Blm_stand   | 78 | -7.45768E-10 | 1.0000000 |
| Edu2way_stand     | 78 | -7.665552E-8 | 1.0000000 |
| Par_stand         | 78 | -5.101939E-8 | 1.0000001 |
| Mage_stand        | 78 | -8.80817E-9  | 1.0000000 |
| GA_stand          | 78 | 1.2435501E-8 | 1.0000000 |

**Standardized variables**  
**Model 1**

|                                    |    |
|------------------------------------|----|
| <b>Number of Observations Read</b> | 78 |
| <b>Number of Observations Used</b> | 78 |

**Dependent Variable: MAAS\_Q\_Blm\_Stand**

| Source                 | DF | Sum of Squares | Mean Square | F Value | Pr > F |
|------------------------|----|----------------|-------------|---------|--------|
| <b>Model</b>           | 6  | 11.42021955    | 1.90336993  | 2.06    | 0.0687 |
| <b>Error</b>           | 71 | 65.57977910    | 0.92365886  |         |        |
| <b>Corrected Total</b> | 77 | 76.99999865    |             |         |        |

| R-Square | Coeff Var  | Root MSE | MAAS_Q_Blm_Stand Mean |
|----------|------------|----------|-----------------------|
| 0.148315 | -8.18538E9 | 0.961072 | -0.000000             |

| Source                   | DF | Type III SS | Mean Square | F Value | Pr > F |
|--------------------------|----|-------------|-------------|---------|--------|
| <b>ECRS_An_Blm_stand</b> | 1  | 0.00148056  | 0.00148056  | 0.00    | 0.9682 |
| <b>ECRS_av_BLM_stand</b> | 1  | 6.93346885  | 6.93346885  | 7.51    | 0.0078 |
| <b>Edu2way_stand</b>     | 1  | 2.58765810  | 2.58765810  | 2.80    | 0.0986 |
| <b>Par_stand</b>         | 1  | 0.10353913  | 0.10353913  | 0.11    | 0.7388 |
| <b>Mage_stand</b>        | 1  | 0.23674427  | 0.23674427  | 0.26    | 0.6142 |
| <b>GA_stand</b>          | 1  | 0.70776205  | 0.70776205  | 0.77    | 0.3843 |

| Parameter                | Estimate      | Standard Error | t Value | Pr >  t | 95% Confidence Limits |              |
|--------------------------|---------------|----------------|---------|---------|-----------------------|--------------|
| <b>Intercept</b>         | -0.000000337  | 0.10881994     | -0.00   | 1.0000  | -0.2169808398         | 0.2169807724 |
| <b>ECRS_An_Blm_stand</b> | 0.0044990297  | 0.11237278     | 0.04    | 0.9682  | -0.2195659252         | 0.2285639846 |
| <b>ECRS_av_BLM_stand</b> | -0.3100550337 | 0.11316687     | -2.74   | 0.0078  | -.5357033627          | -.0844067047 |
| <b>Edu2way_stand</b>     | -0.1959937604 | 0.11709668     | -1.67   | 0.0986  | -0.4294779180         | 0.0374903972 |
| <b>Par_stand</b>         | -0.0415577991 | 0.12412409     | -0.33   | 0.7388  | -0.2890542088         | 0.2059386106 |
| <b>Mage_stand</b>        | -0.0620355847 | 0.12253409     | -0.51   | 0.6142  | -0.3063616274         | 0.1822904581 |
| <b>GA_stand</b>          | 0.0965299250  | 0.11027425     | 0.88    | 0.3843  | -0.1233506942         | 0.3164105441 |

**Standardized variables**

**Model 2**

|                                    |    |
|------------------------------------|----|
| <b>Number of Observations Read</b> | 78 |
| <b>Number of Observations Used</b> | 78 |

**Dependent Variable: MAAS\_Q\_Blm\_Stand**

| Source                 | DF | Sum of Squares | Mean Square | F Value | Pr > F |
|------------------------|----|----------------|-------------|---------|--------|
| <b>Model</b>           | 8  | 24.78909060    | 3.09863632  | 4.10    | 0.0005 |
| <b>Error</b>           | 69 | 52.21090805    | 0.75667983  |         |        |
| <b>Corrected Total</b> | 77 | 76.99999865    |             |         |        |

| R-Square | Coeff Var  | Root MSE | MAAS_Q_Blm_Stand Mean |
|----------|------------|----------|-----------------------|
| 0.321936 | -7.40865E9 | 0.869873 | -0.000000             |

| Source                   | DF | Type III SS | Mean Square | F Value | Pr > F |
|--------------------------|----|-------------|-------------|---------|--------|
| <b>ECRS_An_Blm_stand</b> | 1  | 0.05624098  | 0.05624098  | 0.07    | 0.7860 |
| <b>ECRS_av_BLM_stand</b> | 1  | 1.92534975  | 1.92534975  | 2.54    | 0.1153 |
| <b>Edu2way_stand</b>     | 1  | 1.08687826  | 1.08687826  | 1.44    | 0.2348 |
| <b>Par_stand</b>         | 1  | 0.35944233  | 0.35944233  | 0.48    | 0.4930 |
| <b>Mage_stand</b>        | 1  | 0.05860224  | 0.05860224  | 0.08    | 0.7816 |
| <b>GA_stand</b>          | 1  | 0.87921423  | 0.87921423  | 1.16    | 0.2848 |
| <b>EPDS_Blm_stand</b>    | 1  | 6.00338447  | 6.00338447  | 7.93    | 0.0063 |
| <b>PPRFQ_Blm_stand</b>   | 1  | 7.83025727  | 7.83025727  | 10.35   | 0.0020 |

| Parameter                | Estimate     | Standard Error | t Value | Pr >  t | 95% Confidence Limits |              |
|--------------------------|--------------|----------------|---------|---------|-----------------------|--------------|
| <b>Intercept</b>         | -0.000000204 | 0.09849377     | -0.00   | 1.0000  | -.1964897223          | 0.1964896815 |
| <b>ECRS_An_Blm_stand</b> | -.0301332394 | 0.11052880     | -0.27   | 0.7860  | -.2506321719          | 0.1903656932 |
| <b>ECRS_av_BLM_stand</b> | -.1806025421 | 0.11322051     | -1.60   | 0.1153  | -.4064712865          | 0.0452662022 |
| <b>Edu2way_stand</b>     | -.1297229693 | 0.10823869     | -1.20   | 0.2348  | -.3456532379          | 0.0862072993 |
| <b>Par_stand</b>         | 0.0821119293 | 0.11913729     | 0.69    | 0.4930  | -.1555604647          | 0.3197843234 |
| <b>Mage_stand</b>        | -.0312794786 | 0.11239797     | -0.28   | 0.7816  | -.2555072947          | 0.1929483375 |
| <b>GA_stand</b>          | 0.1080751948 | 0.10026163     | 1.08    | 0.2848  | -.0919412800          | 0.3080916697 |
| <b>EPDS_Blm_stand</b>    | -.3305228878 | 0.11734364     | -2.82   | 0.0063  | -.5646170346          | -.0964287410 |
| <b>PPRFQ_Blm_stand</b>   | 0.3776791660 | 0.11740622     | 3.22    | 0.0020  | 0.1434601739          | 0.6118981581 |
